# Supplementary material for: An efficient alternative to DBU in the oxathiaphospholane (OTP) method for the solid phase synthesis of P-stereodefined phosphorothioate analogs
Source: Royal Society of Chemistry journal article supplement (doi:10.1039/d4ra02833c), 2024-01-01
Supplement: d4ra02833c1.pdf [file d4ra02833c1.pdf]

## SUPPLEMENTARY INFORMATION

### Alternative activators in oxathiaphospholane (OTP) method to the solid phase synthesis of P-stereodefined phosphorothioate analogs

Katarzyna Jastrzębska\*

Centre of Molecular and Macromolecular Studies, Polish Academy of Sciences, Sienkiewicza 112,  
90-363 Łódź, Poland

### Table of Contents

#### Experimental information

1. General 'solid phase' synthesis of dinucleotides.....2-3
2. Table 1. Detailed procedure of condensation.....3

#### Supporting data

**Figure S1.** Structures of the studied compounds **1a-1e**, their molecular weight and numbers of  $\mu\text{mols}$ .....4

**Figure S2-3.**  $^{31}\text{P}$  NMR spectrum of crude reaction mixture of *m*U-OTP formation and purified *m*U-OTP (**1e**) (analysis performed in non-deuterium solvent).....5-6

**Figure S4-20.** Overlaid VIS spectra for measurement of the  $\text{DMT}^+$  cation absorption ( $\lambda_{\text{max}}=504$  nm) after consecutive detritylation steps during the coupling of **1a-1e** in the presence of various activators ('solid phase' at 1  $\mu\text{mole}$  scale).....7-23

**Figures S21.** HPLC profiles recorded for P-stereodefined dinucleotides formed from OTP **1a** in the presence of various activators .....24

**Figure S22.** HPLC profile recorded for P-stereodefined dinucleotide formed from OTP **1a** (*fast*-eluting P-diastereomer) in the presence of DBU.....25

**Figure S23.** HPLC profile recorded for P-stereodefined dinucleotide formed from OTP **1a** (*fast*-eluting P-diastereomer) in the presence of TBD.....26

**Figure S24.** HPLC profile recorded for P-stereodefined dinucleotide formed from OTP **1a** (*fast*-eluting P-diastereomer) in the presence of Verkade base.....27

**Figure S25.** HPLC profile recorded for dinucleotide formed from OTP **1a** (mixture of P-diastereomers) in the presence of DBU.....28

### 1. General 'solid phase' synthesis of dinucleotides

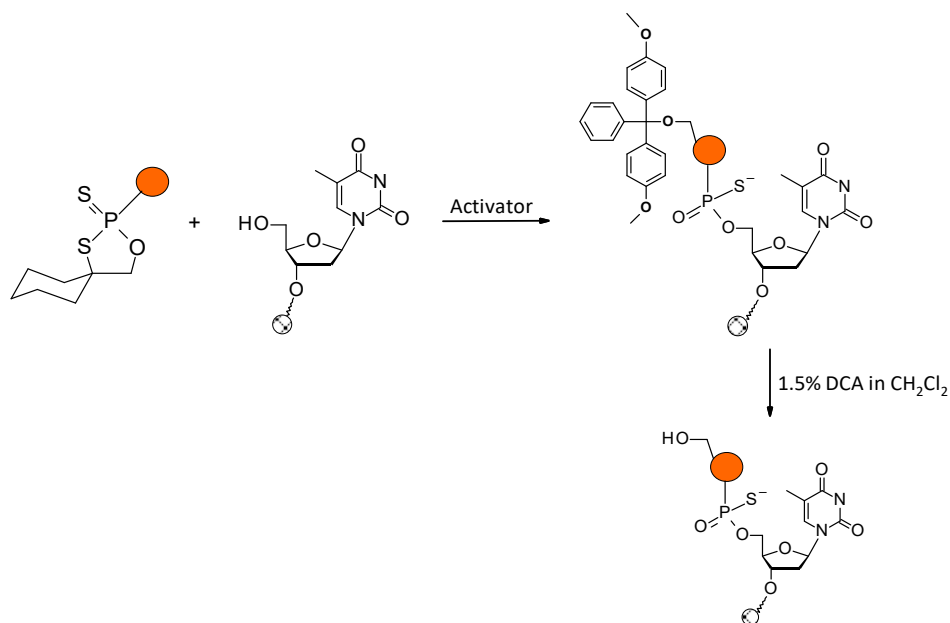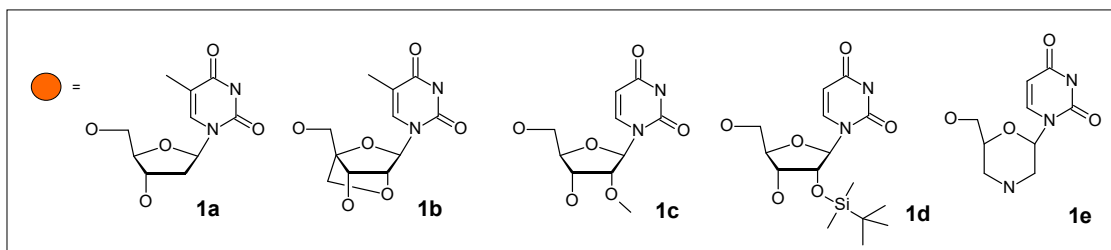

In the column 5'-O-DMT nucleoside unit (1 mmol load) anchored to the LCA CPG support was detritylated with a 3% solution of DCA (dichloroacetic acid) in methylene chloride, washed with 5 mL of dry acetonitrile followed by 5 mL of dry methylene chloride and dried under high vacuum. For the coupling step, a solution of a suitable oxathiaphospholane monomer **1** (20 μmol) and activator (50 μmol) in dry acetonitrile (150 μL) was prepared and instantly introduced into the column (**Picture A**). After 15 minutes of intensive swirling the column (**Picture B**) was washed with dry acetonitrile (5 mL) and dry methylene chloride (5 mL). Unreacted 5'-hydroxyl groups were capped using the standard DMAP–Ac<sub>2</sub>O–pyridine solution in THF (**Picture C**), washed with 5 mL of dry acetonitrile followed by 5 mL of dry methylene chloride and dried under high vacuum. Then the column containing the dimer was detritylated with a 3% solution of DCA in methylene chloride, washed with 5 mL of dry acetonitrile followed by 5 mL of dry methylene chloride and dried under high vacuum. The coupling efficiency is controlled by measuring the absorbance at 504 nm coming from the released DMT<sup>+</sup> cation (**Picture D**). In the case of synthesis longer oligomer, a solution of the next oxathiaphospholane monomer **1** (20 μmol) and activator (50 μmol) in dry acetonitrile (150 μL) was prepared and introduced into the column. When the synthesis was complete, the dimer was cleaved from the support under standard conditions (25% NH<sub>4</sub>OH, 2h). The sample was concentrated under reduced pressure in a Speed-Vac concentrator.

**Table 1.** Detailed procedure of condensation

| Detailed procedure                                   |                                                                                     |                                                                                      |                                                                                          |
|------------------------------------------------------|-------------------------------------------------------------------------------------|--------------------------------------------------------------------------------------|------------------------------------------------------------------------------------------|
|                                                      | 1 M DBU                                                                             | 3 M TBD                                                                              | 2M Verkade                                                                               |
| Solution (stock)                                     | 40 $\mu$ L DBU + 210 $\mu$ L CH <sub>3</sub> CN                                     | 104mg TBD + 250 $\mu$ L CH <sub>3</sub> CN                                           | 108mg Verkade + 250 $\mu$ L CH <sub>3</sub> CN                                           |
| One condensation: 20mg of monomer were dissolved in: | 50 $\mu$ L + 100 $\mu$ L CH <sub>3</sub> CN (50 $\mu$ moles stock of DBU were used) | 50 $\mu$ L + 100 $\mu$ L CH <sub>3</sub> CN (150 $\mu$ moles stock of TBD were used) | 50 $\mu$ L + 100 $\mu$ L CH <sub>3</sub> CN (100 $\mu$ moles stock of Verkade were used) |

Loading of the support with the respective nucleoside as determined by trityl assay: CPG-sarcosinyl-dT: 35.0  $\mu$ mol/g. The coupling reactions were performed at the 1  $\mu$ mol scale (in all experiments thymidine was attached to the support) using ~25-fold molar excess of each OTP monomer and 50-, 150- and 100-fold excess of DBU (1M), TBD (3M) and Verkade (2M), respectively.

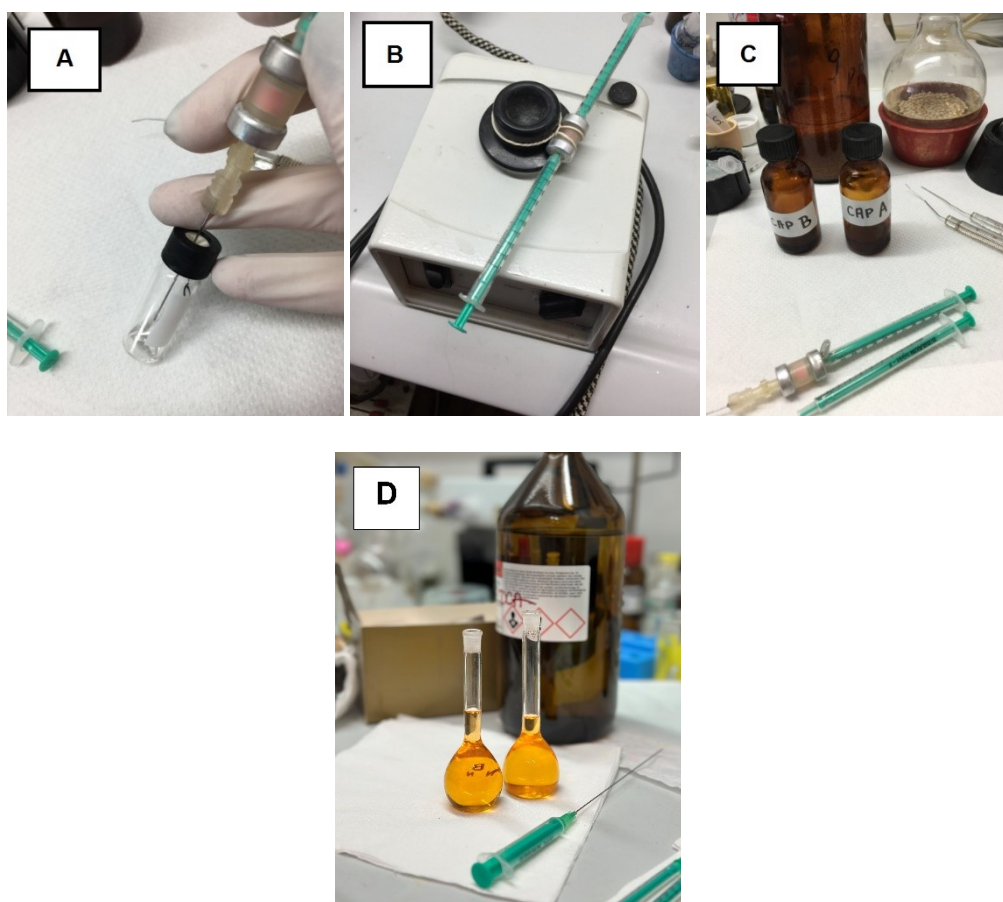

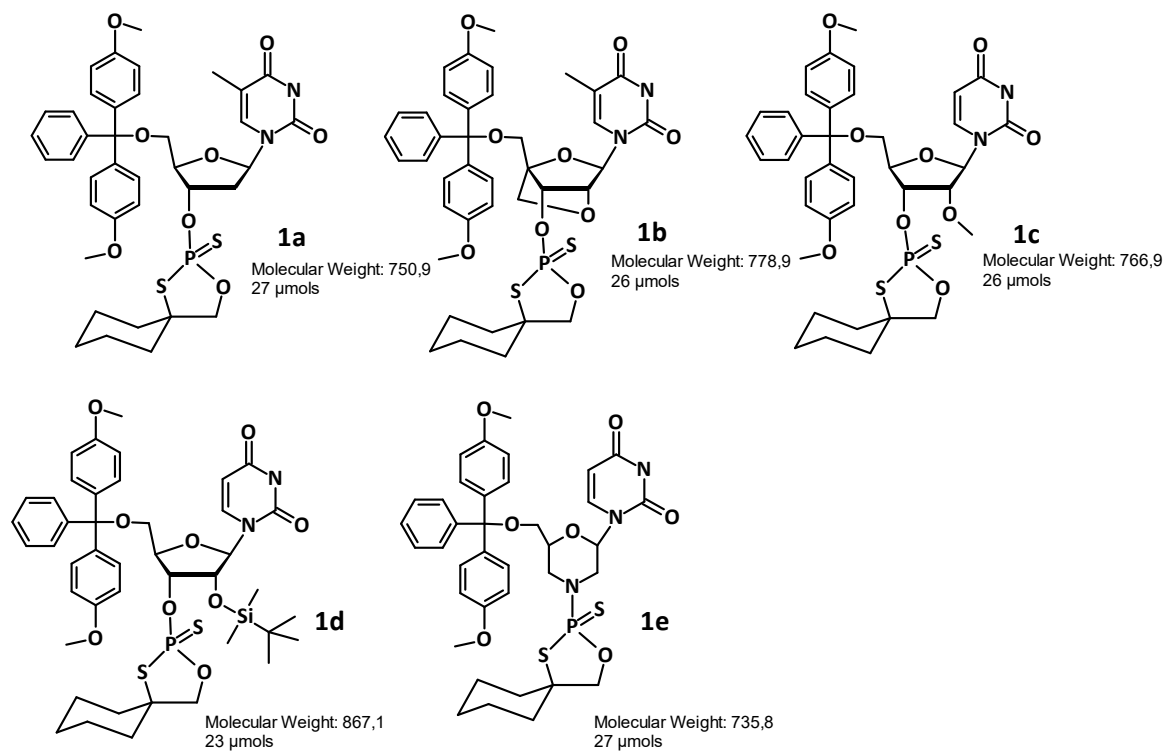

**Figure S1.** Structures of the studied compounds **1a-1e**, their molecular weight and numbers of  $\mu$ ols

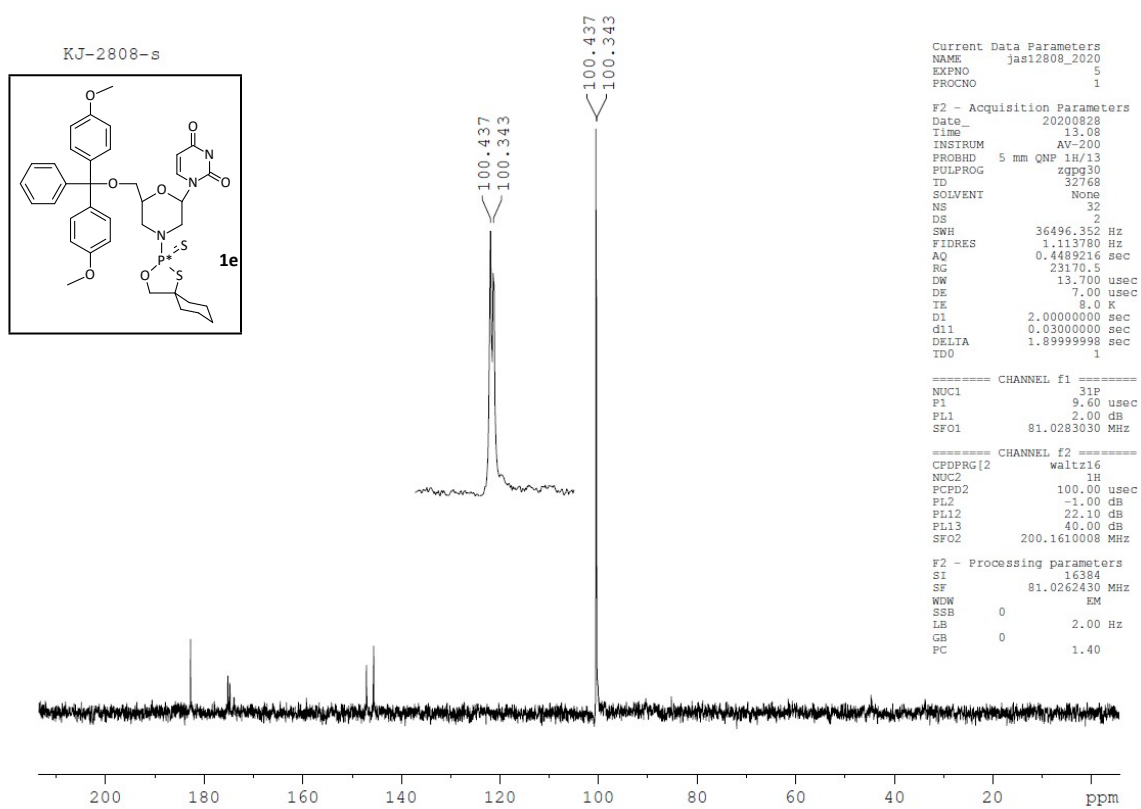

**Figure S2.**  $^{31}\text{P}$  NMR spectrum of crude reaction mixture of *mU*-OTP formation (**1e**) (analysis performed in non-deuterium solvent).



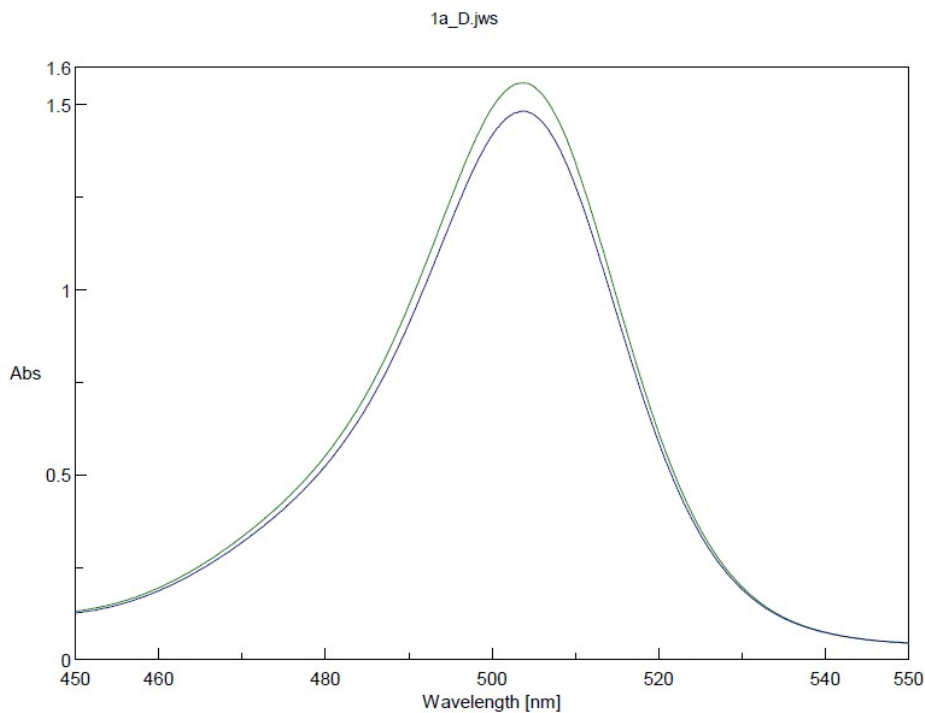

[Comments]  
 Sample name  
 Comment  
 User  
 Division  
 Company                      CBMIM PAN

[Detailed Information]  
 Creation date                08.12.2023 13:33

Data array type            Linear data array  
 Horizontal axis            Wavelength [nm]  
 Vertical axis                Abs  
 Start                        550 nm  
 End                         450 nm  
 Data interval              0.2 nm  
 Data points                501

[Measurement Information]  
 Instrument name          V-770  
 Model name                V-770  
 Serial No.                 D070961801

Accessory                 PAC-743R  
 Accessory S/N            C014361221  
 Temperature             43254.43 C  
 Control sensor            Holder  
 Monitor sensor          Holder  
 Start mode                Keep +/-0.10 C of the target temperature for 5 seconds

Measurement date        08.12.2023 13:33

Parameter file            C:\Users\CBMIM PAN\Desktop\KJastrzebska\trityl\trityl.uvsp  
 Photometric mode        Abs  
 Measurement range      550 - 450 nm  
 Data interval             0.2 nm  
 UV/Vis bandwidth      0.5 nm  
 NIR bandwidth            2.0 nm  
 UV/Vis response        0.06 sec  
 NIR response             0.06 sec  
 Scan mode                Continuous

| No. | File Name | Sample Name | Co Date       | Peak 1 | Peak Vakuie 1 |
|-----|-----------|-------------|---------------|--------|---------------|
| 1   | 1a_0d.jws |             | 2023/12/08 13 | 503.8  | 1.55865       |
| 2   | 1a_D.jws  |             | 2023/12/08 13 | 503.8  | 1.48293       |

**Figure S4.** Overlaid VIS spectra for measurement of the DMT<sup>+</sup> cation absorption ( $\lambda_{\max}$ =504 nm) after consecutive detritylation steps during the coupling of **1a** in the presence of 1M DBU (at 1  $\mu$ mole scale)

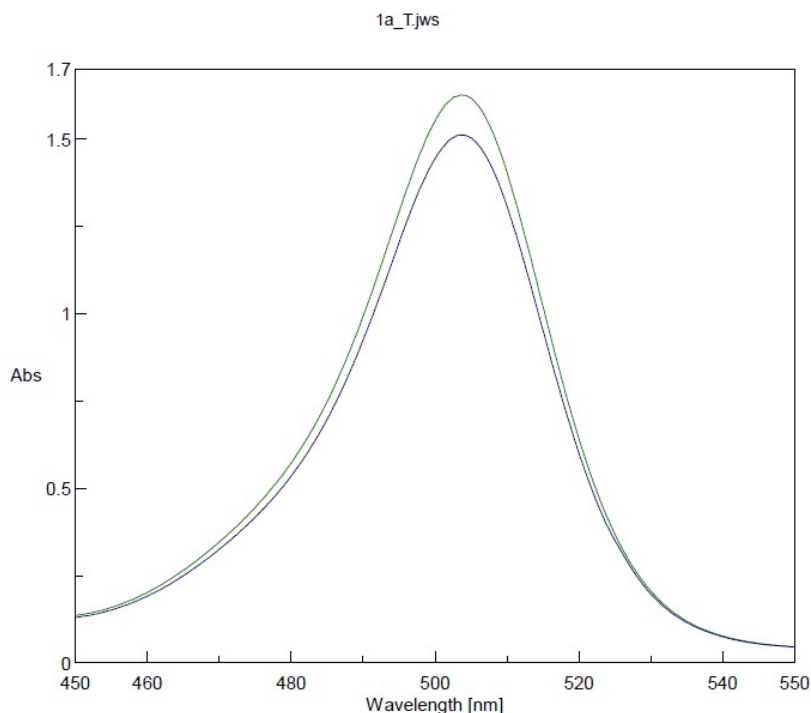

[Comments]  
Sample name  
Comment  
User  
Division  
Company

CBMIM PAN

[Detailed Information]  
Creation date 08.12.2023 13:41

Data array type Linear data array  
Horizontal axis Wavelength [nm]  
Vertical axis Abs  
Start 550 nm  
End 450 nm  
Data interval 0.2 nm  
Data points 501

[Measurement Information]  
Instrument name V-770  
Model name V-770  
Serial No. D070961801

Accessory PAC-743R  
Accessory S/N C014361221  
Temperature 43254.43 C  
Control sensor Holder  
Monitor sensor Holder  
Start mode Keep +/-0.10 C of the target temperature for 5 seconds

Measurement date 08.12.2023 13:41

Parameter file C:\Users\CBMIM PAN\Desktop\KJastrzebska\trityls\trityl.uvsp  
Photometric mode Abs  
Measurement range 550 - 450 nm  
Data interval 0.2 nm  
UV/Vis bandwidth 0.5 nm  
NIR bandwidth 2.0 nm  
UV/Vis response 0.06 sec  
NIR response 0.06 sec  
Scan mode Continuous

| No. | File Name | Sample Name | C | Date             | Peak 1 | Peak Value 1 |
|-----|-----------|-------------|---|------------------|--------|--------------|
| 6   | 1a_0t.jws |             |   | 2023/12/08 13:39 | 503.6  | 1.62487      |
| 8   | 1a_T.jws  |             |   | 2023/12/08 13:41 | 503.4  | 1.51065      |
|     |           |             |   |                  |        |              |

**Figure S5.** Overlaid VIS spectra for measurement of the DMT<sup>+</sup> cation absorption ( $\lambda_{max}$ =504 nm) after consecutive detritylation steps during the coupling of **1a** in the presence of 3M TBD (at 1  $\mu$ mole scale).



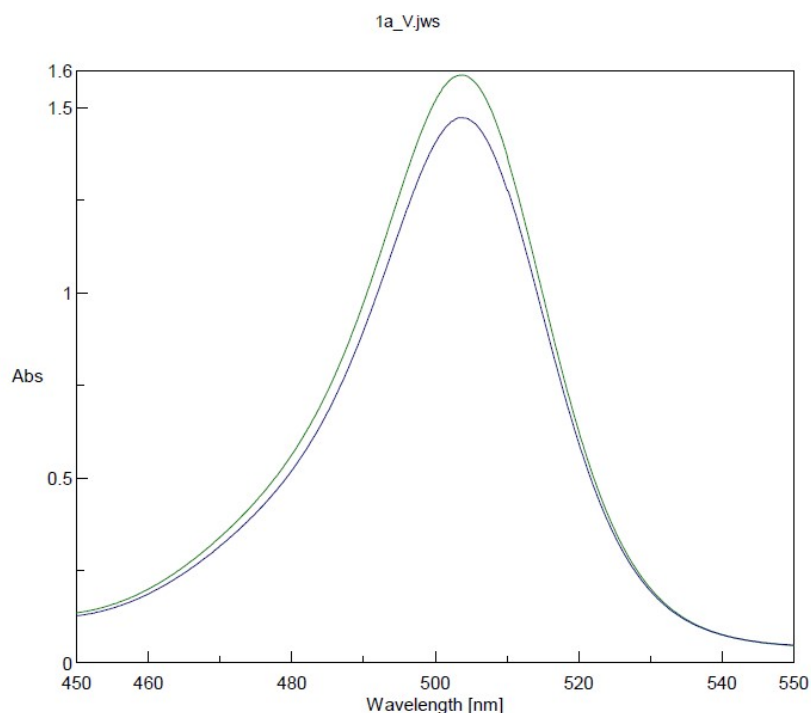

[Comments]  
Sample name  
Comment  
User  
Division  
Company

CBMIM PAN

[Detailed Information]  
Creation date 08.12.2023 13:46

Data array type Linear data array  
Horizontal axis Wavelength [nm]  
Vertical axis Abs  
Start 550 nm  
End 450 nm  
Data interval 0.2 nm  
Data points 501

[Measurement Information]  
Instrument name V-770  
Model name V-770  
Serial No. D070961801

Accessory PAC-743R  
Accessory S/N C014361221  
Temperature 43254.43 C  
Control sensor Holder  
Monitor sensor Holder  
Start mode Keep +/-0.10 C of the target temperature for 5 seconds

Measurement date 08.12.2023 13:46

Parameter file C:\Users\CBMIM PAN\Desktop\KJastrzebska\trityls\trityl.uvsp  
Photometric mode Abs  
Measurement range 550 - 450 nm  
Data interval 0.2 nm  
UV/vis bandwidth 0.5 nm  
NIR bandwidth 2.0 nm  
UV/vis response 0.06 sec  
NIR response 0.06 sec  
Scan mode Continuous

| No. | File Name | Sample Name | Co | Date             | Peak 1 | Peak Value 1 |
|-----|-----------|-------------|----|------------------|--------|--------------|
| 3   | 1a_0v.jws |             |    | 2023/12/08 13:45 | 503.8  | 1.58746      |
| 5   | 1a_V.jws  |             |    | 2023/12/08 13:46 | 503.8  | 1.47227      |
|     |           |             |    |                  |        |              |

**Figure S6.** Overlaid VIS spectra for measurement of the DMT<sup>+</sup> cation absorption ( $\lambda_{\max}$ =504 nm) after consecutive detritylation steps during the coupling of **1a** in the presence of 2M Verkade base (at 1  $\mu$ mole scale)

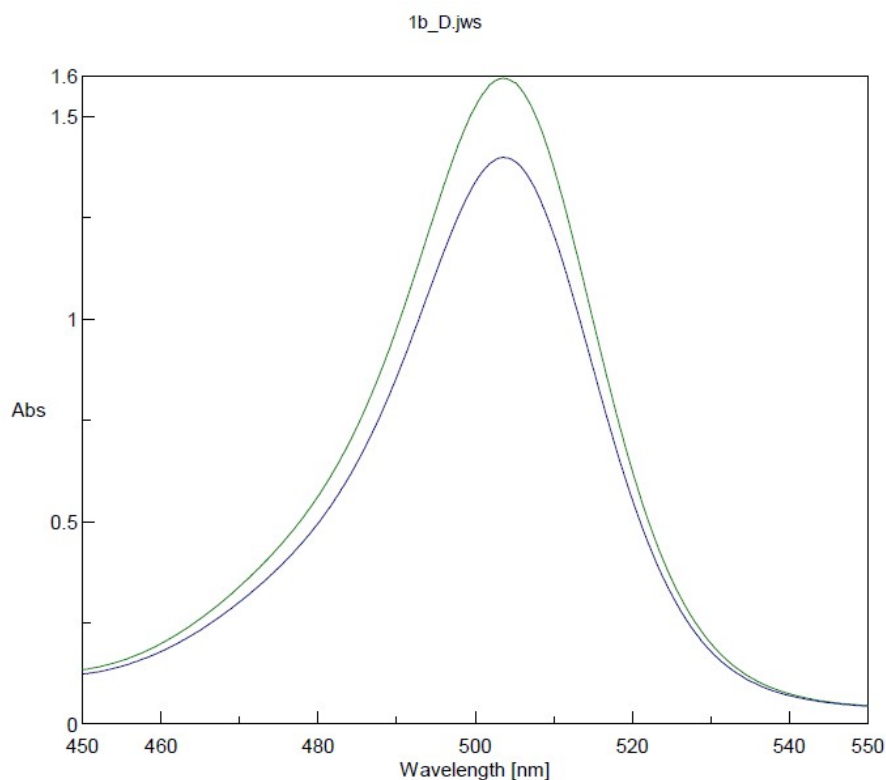

[Comments]  
Sample name  
Comment  
User  
Division  
Company

CBMIM PAN

[Detailed Information]  
Creation date 09.12.2023 09:00

Data array type Linear data array  
Horizontal axis Wavelength [nm]  
Vertical axis Abs  
Start 550 nm  
End 450 nm  
Data interval 0.2 nm  
Data points 501

[Measurement Information]  
Instrument name V-770  
Model name V-770  
Serial No. D070961801

Accessory PAC-743R  
Accessory S/N C014361221  
Temperature 66192.56 C  
Control sensor Holder  
Monitor sensor Holder  
Start mode Keep +/-0.10 C of the target temperature for 5 seconds

Measurement date 09.12.2023 09:00

Parameter file C:\Users\CBMIM PAN\Desktop\KJastrzebska\trityl\trityl.uvsp  
Photometric mode Abs  
Measurement range 550 - 450 nm  
Data interval 0.2 nm  
UV/Vis bandwidth 0.5 nm  
NIR bandwidth 2.0 nm  
UV/Vis response 0.06 sec  
NIR response 0.06 sec  
Scan mode Continuous

| No. | File Name | Sample Name | Co | Date             | Peak 1 | Peak Vakuie 1 |
|-----|-----------|-------------|----|------------------|--------|---------------|
| 1   | 1b_0d.jws |             |    | 2023/12/09 08:57 | 503.6  | 1.59326       |
| 2   | 1b_D.jws  |             |    | 2023/12/09 09:00 | 503.6  | 1.39918       |

**Figure S7.** Overlaid VIS spectra for measurement of the DMT<sup>+</sup> cation absorption ( $\lambda_{\max}$ =504 nm) after consecutive detritylation steps during the coupling of **1b** in the presence of 1M DBU (at 1  $\mu$ mole scale)

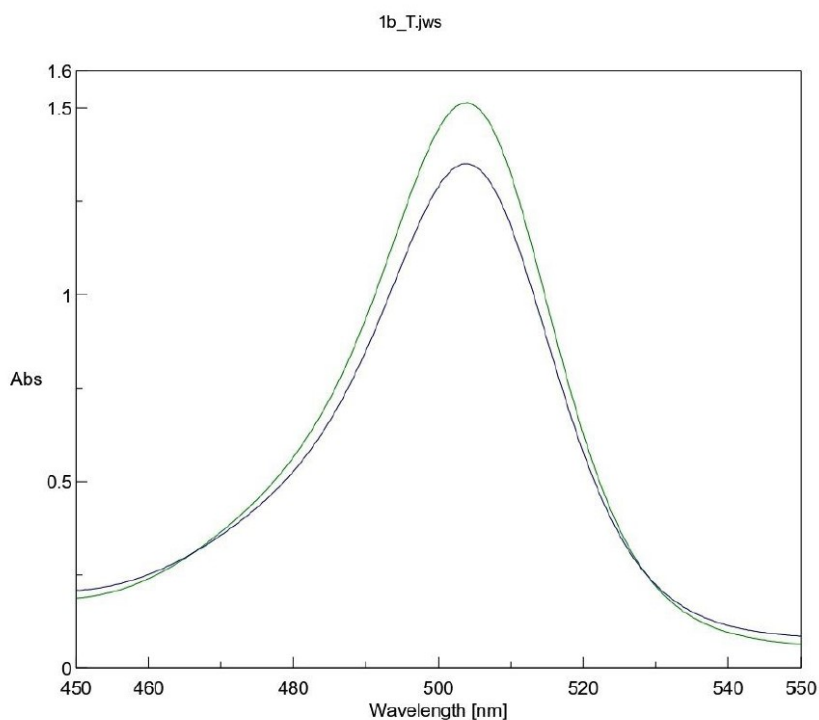

[Comments]  
 Sample name  
 Comment  
 User  
 Division  
 Company

CBMiM PAN

[Detailed Information]  
 Creation date 20.12.2023 16:10  
 Date modified 21.12.2023 14:26

[Measurement Information]  
 Instrument name V-770  
 Model name V-770  
 Serial No. D070961801

Accessory PAC-743R  
 Accessory S/N C014361221  
 Temperature 66192.56 C  
 Control sensor Holder  
 Monitor sensor Holder  
 Start mode Keep +/-0.10 C of the target temperature for 5 seconds

Measurement date 20.12.2023 16:10

Parameter file C:\Users\CBMiM PAN\Desktop\KJastrzebska\trityls\trityl.uvsp  
 Photometric mode Abs  
 Measurement range 550 - 450 nm  
 Data interval 0.2 nm  
 UV/Vis bandwidth 0.5 nm  
 NIR bandwidth 2.0 nm  
 UV/Vis response 0.06 sec  
 NIR response 0.06 sec  
 Scan mode Continuous

— 1b\_T0.jws  
 — 1b\_T.jws

| No. | File Name | Sample Name | Conc | Date       | Peak 1 | Peak Value 1 |
|-----|-----------|-------------|------|------------|--------|--------------|
| 1   | 1b_T0.jws |             |      | 2023/12/20 | 503.6  | 1.53388      |
| 2   | 1b_T.jws  |             |      | 2023/12/20 | 503.4  | 1.31152      |

**Figure S8.** Overlaid VIS spectra for measurement of the DMT<sup>+</sup> cation absorption ( $\lambda_{\max}$ =504 nm) after consecutive detritylation steps during the coupling of **1b** in the presence of 3M TBD (at 1  $\mu$ mole scale).

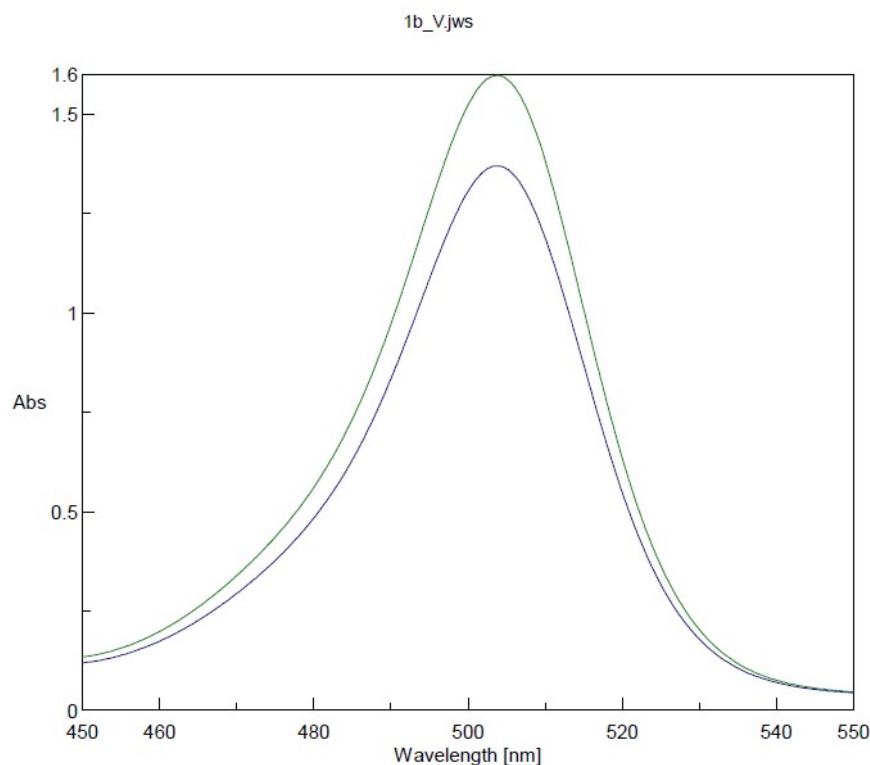

[Comments]  
Sample name  
Comment  
User  
Division  
Company                      CBMIM PAN

[Detailed Information]  
Creation date                      08.12.2023 13:57

[Measurement Information]  
Instrument name                      V-770  
Model name                      V-770  
Serial No.                      D070961801

Accessory                      PAC-743R  
Accessory S/N                      C014361221  
Temperature                      43254.43 C  
Control sensor                      Holder  
Monitor sensor                      Holder  
Start mode                      Keep +/-0.10 C of the target temperature for 5 seconds

Measurement date                      08.12.2023 13:57

Parameter file                      C:\Users\CBMIM PAN\Desktop\KJastrzebska\trityls\trityl.uvsp  
Photometric mode                      Abs  
Measurement range                      550 - 450 nm  
Data interval                      0.2 nm  
UV/Vis bandwidth                      0.5 nm  
NIR bandwidth                      2.0 nm  
UV/Vis response                      0.06 sec  
NIR response                      0.06 sec  
Scan mode                      Continuous

— 1b\_0v.jws  
— 1b\_V.jws

| No. | File Name | Sample Name | Co | Date             | Peak 1 | Peak Value 1 |
|-----|-----------|-------------|----|------------------|--------|--------------|
| 1   | 1b_0v.jws |             |    | 2023/12/08 13:53 | 504    | 1.59624      |
| 2   | 1b_V.jws  |             |    | 2023/12/08 13:57 | 503.4  | 1.36894      |

**Figure S9.** Overlaid VIS spectra for measurement of the DMT<sup>+</sup> cation absorption ( $\lambda_{\max}$ =504 nm) after consecutive detritylation steps during the coupling of **1b** in the presence of 2M Verkade base (at 1  $\mu$ mole scale).

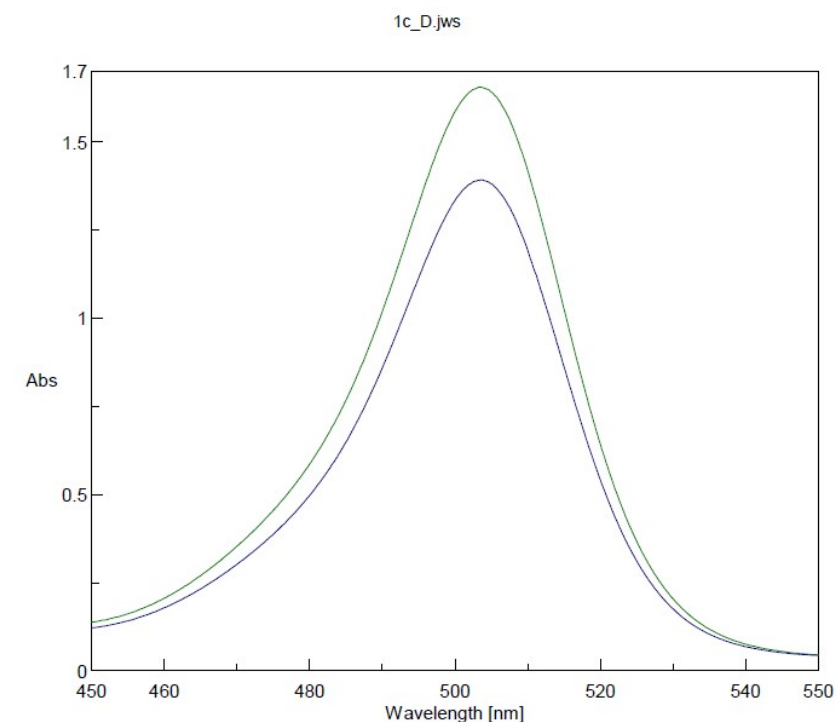

[Comments]  
 Sample name  
 Comment  
 User  
 Division  
 Company                      CBMIM PAN

[Detailed Information]  
 Creation date                09.12.2023 08:46

Data array type              Linear data array  
 Horizontal axis              Wavelength [nm]  
 Vertical axis                 Abs  
 Start                          550 nm  
 End                             450 nm  
 Data interval                0.2 nm  
 Data points                  501

[Measurement Information]  
 Instrument name            V-770  
 Model name                 V-770  
 Serial No.                  D070961801

Accessory                    PAC-743R  
 Accessory S/N              C014361221  
 Temperature                66192.56 C  
 Control sensor              Holder  
 Monitor sensor              Holder  
 Start mode                  Keep +/-0.10 C of the target temperature for 5 seconds

Measurement date        09.12.2023 08:46

Parameter file              C:\Users\CBMIM PAN\Desktop\KJastrzebska\trityl\trityl.uvsp  
 Photometric mode         Abs  
 Measurement range        550 - 450 nm  
 Data interval               0.2 nm  
 UV/Vis bandwidth        0.5 nm  
 NIR bandwidth             2.0 nm  
 UV/Vis response          0.06 sec  
 NIR response               0.06 sec  
 Scan mode                  Continuous

| No. | File Name | Sample Name | Co | Date             | Peak 1 | Peak Value 1 |
|-----|-----------|-------------|----|------------------|--------|--------------|
| 1   | 1c_0d.jws |             |    | 2023/12/09 08:42 | 503.2  | 1.65346      |
| 2   | 1c_D.jws  |             |    | 2023/12/09 08:46 | 503.6  | 1.39126      |

**Figure S10.** Overlaid VIS spectra for measurement of the DMT<sup>+</sup> cation absorption ( $\lambda_{max}=504$  nm) after consecutive detritylation steps during the coupling of **1c** in the presence of 1M DBU (at 1  $\mu$ mole scale)

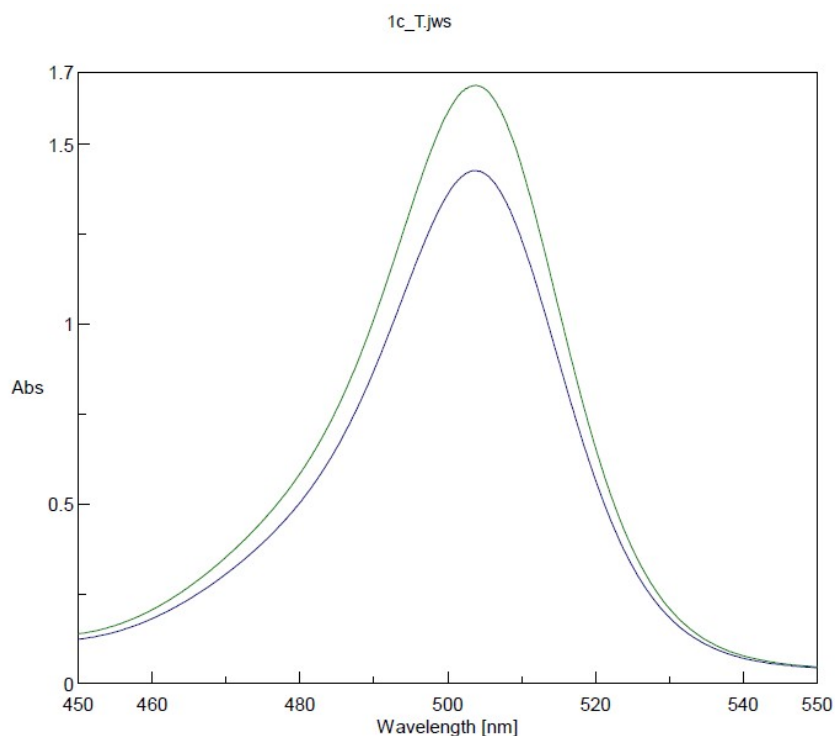

[Comments]  
Sample name  
Comment  
User  
Division  
Company CBMIM PAN

[Detailed Information]  
Creation date 09.12.2023 09:13  
Data array type Linear data array  
Horizontal axis Wavelength [nm]  
Vertical axis Abs  
Start 550 nm  
End 450 nm  
Data interval 0.2 nm  
Data points 501

[Measurement Information]  
Instrument name V-770  
Model name V-770  
Serial No. D070961801  
Accessory PAC-743R  
Accessory S/N C014361221  
Temperature 66192.56 C  
Control sensor Holder  
Monitor sensor Holder  
Start mode Keep +/-0.10 C of the target temperature for 5 seconds

Measurement date 09.12.2023 09:12

Parameter file C:\Users\CBMIM PAN\Desktop\KJastrzebska\trityls\trityl.uvsp  
Photometric mode Abs  
Measurement range 550 - 450 nm  
Data interval 0.2 nm  
UV/Vis bandwidth 0.5 nm  
NIR bandwidth 2.0 nm  
UV/Vis response 0.06 sec  
NIR response 0.06 sec  
Scan mode Continuous

| No. | File Name | Sample Name | Co | Date             | Peak 1 | Peak Value 1 |
|-----|-----------|-------------|----|------------------|--------|--------------|
| 1   | 1c_0t.jws |             |    | 2023/12/09 09:08 | 503.8  | 1.66291      |
| 2   | 1c_T.jws  |             |    | 2023/12/09 09:12 | 503.8  | 1.42606      |

**Figure S11.** Overlaid VIS spectra for measurement of the DMT<sup>+</sup> cation absorption ( $\lambda_{\max}$ =504 nm) after consecutive detritylation steps during the coupling of **1c** in the presence of 3M TBD (at 1  $\mu$ mole scale).

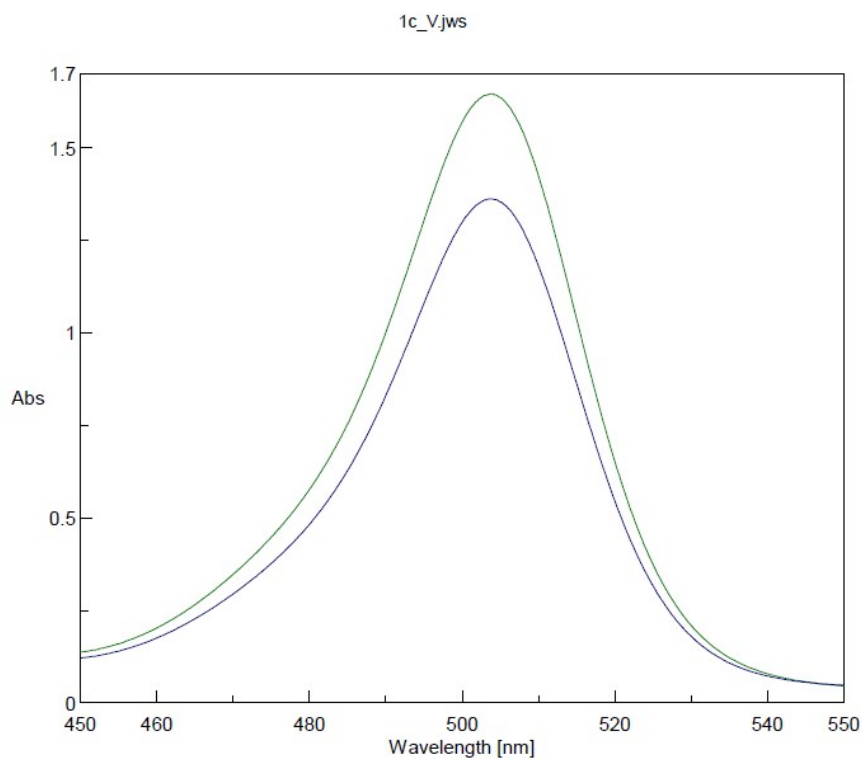

[Comments]  
Sample name  
Comment  
User  
Division  
Company                   CBMiM PAN

[Detailed Information]  
Creation date           09.12.2023 09:20

Data array type       Linear data array  
Horizontal axis       Wavelength [nm]  
Vertical axis           Abs  
Start                   550 nm  
End                     450 nm  
Data interval          0.2 nm  
Data points            501

[Measurement Information]  
Instrument name       V-770  
Model name            V-770  
Serial No.             D070961801

Accessory             PAC-743R  
Accessory S/N         C014361221  
Temperature           66192.56 C  
Control sensor        Holder  
Monitor sensor        Holder  
Start mode            Keep +/-0.10 C of the target temperature for 5 seconds

Measurement date    09.12.2023 09:20

Parameter file        C:\Users\CBMiM PAN\Desktop\KJastrzebska\trityls\trityl.uvsp  
Photometric mode     Abs  
Measurement range    550 - 450 nm  
Data interval         0.2 nm  
UV/Vis bandwidth    0.5 nm  
NIR bandwidth        2.0 nm  
UV/Vis response      0.06 sec  
NIR response         0.06 sec  
Scan mode             Continuous

| No. | File Name | Sample Name | Co Date          | Peak 1 | Peak Value 1 |
|-----|-----------|-------------|------------------|--------|--------------|
| 1   | 1c_0v.jws |             | 2023/12/09 09:16 | 504    | 1.64392      |
| 2   | 1c_V.jws  |             | 2023/12/09 09:20 | 503.8  | 1.36074      |

**Figure S12.** Overlaid VIS spectra for measurement of the DMT<sup>+</sup> cation absorption ( $\lambda_{\text{max}}=504$  nm) after consecutive detritylation steps during the coupling of **1c** in the presence of 2M Verkade base (at 1  $\mu\text{mole}$  scale).

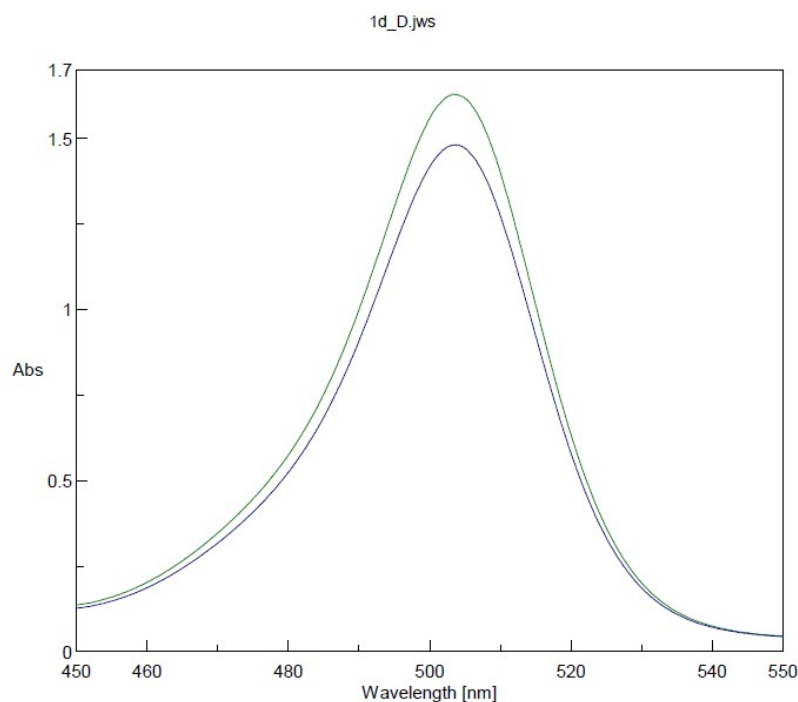

[Comments]  
Sample name  
Comment  
User  
Division  
Company

CBMIM PAN

[Detailed Information]  
Creation date 09.12.2023 08:51

Data array type Linear data array  
Horizontal axis Wavelength [nm]  
Vertical axis Abs  
Start 550 nm  
End 450 nm  
Data interval 0.2 nm  
Data points 501

[Measurement Information]  
Instrument name V-770  
Model name V-770  
Serial No. D070961801

Accessory PAC-743R  
Accessory S/N C014361221  
Temperature 66192.56 C  
Control sensor Holder  
Monitor sensor Holder  
Start mode Keep +/-0.10 C of the target temperature for 5 seconds

Measurement date 09.12.2023 08:51

Parameter file C:\Users\CBMIM PAN\Desktop\KJastrzebska\trityls\trityl.uvsp  
Photometric mode Abs  
Measurement range 550 - 450 nm  
Data interval 0.2 nm  
UV/vis bandwidth 0.5 nm  
NIR bandwidth 2.0 nm  
UV/vis response 0.06 sec  
NIR response 0.06 sec  
Scan mode Continuous

| No. | File Name | Sample Name | Cl | Date             | Peak 1 | Peak Vakuie 1 |
|-----|-----------|-------------|----|------------------|--------|---------------|
| 1   | 1d_0d.jws |             |    | 2023/12/09 08:50 | 503.2  | 1.62854       |
| 2   | 1d_D.jws  |             |    | 2023/12/09 08:51 | 504    | 1.48035       |

**Figure S13.** Overlaid VIS spectra for measurement of the DMT<sup>+</sup> cation absorption ( $\lambda_{\max}$ =504 nm) after consecutive detritylation steps during the coupling of **1d** in the presence of 1M DBU (at 1  $\mu$ mole scale)



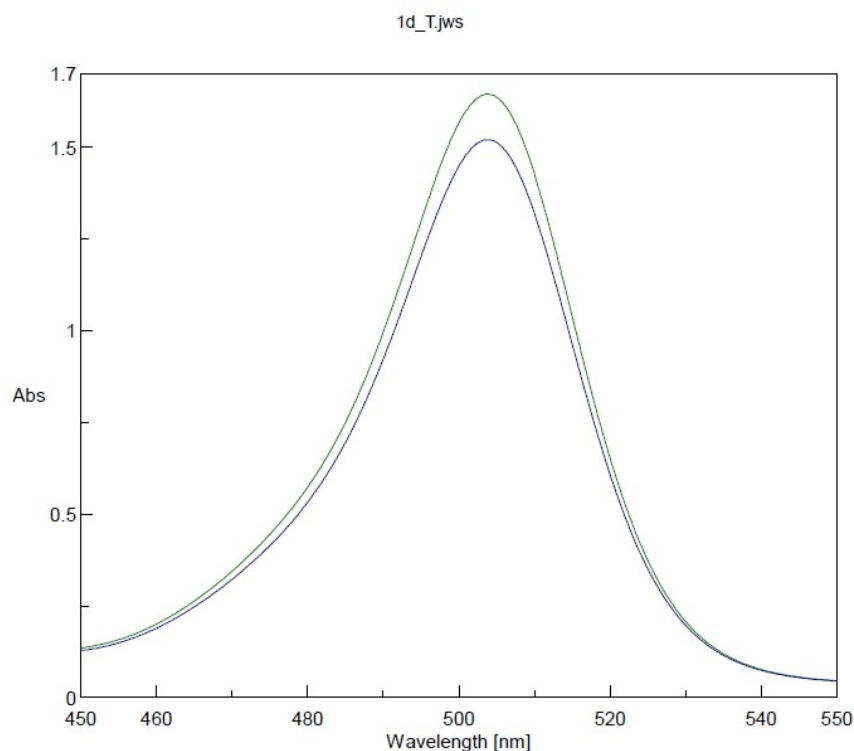

[Comments]  
 Sample name  
 Comment  
 User  
 Division  
 Company CBMIM PAN

[Detailed Information]  
 Creation date 08.12.2023 14:02

Data array type Linear data array  
 Horizontal axis Wavelength [nm]  
 Vertical axis Abs  
 Start 550 nm  
 End 450 nm  
 Data interval 0.2 nm  
 Data points 501

[Measurement Information]  
 Instrument name V-770  
 Model name V-770  
 Serial No. D070961801

Accessory PAC-743R  
 Accessory S/N C014361221  
 Temperature 43254.43 C  
 Control sensor Holder  
 Monitor sensor Holder  
 Start mode Keep +/-0.10 C of the target temperature for 5 seconds

Measurement date 08.12.2023 14:02

Parameter file C:\Users\CBMiM PAN\Desktop\K.Jastrzebska\trityl\trityl.uvsp  
 Photometric mode Abs  
 Measurement range 550 - 450 nm  
 Data interval 0.2 nm  
 UV/Vis bandwidth 0.5 nm  
 NIR bandwidth 2.0 nm  
 UV/Vis response 0.06 sec  
 NIR response 0.06 sec  
 Scan mode Continuous

| No. | File Name | Sample Name | Conc | Date             | Peak 1 | Peak Value 1 |
|-----|-----------|-------------|------|------------------|--------|--------------|
| 1   | 1d_0t.jws |             |      | 2023/12/08 14:00 | 503.8  | 1.64399      |
| 2   | 1d_Tjws   |             |      | 2023/12/08 14:02 | 504.2  | 1.51922      |

**Figure S14.** Overlaid VIS spectra for measurement of the DMT<sup>+</sup> cation absorption ( $\lambda_{\text{max}}=504$  nm) after consecutive detritylation steps during the coupling of **1d** in the presence of 3M TBD (at 1  $\mu\text{mole}$  scale).

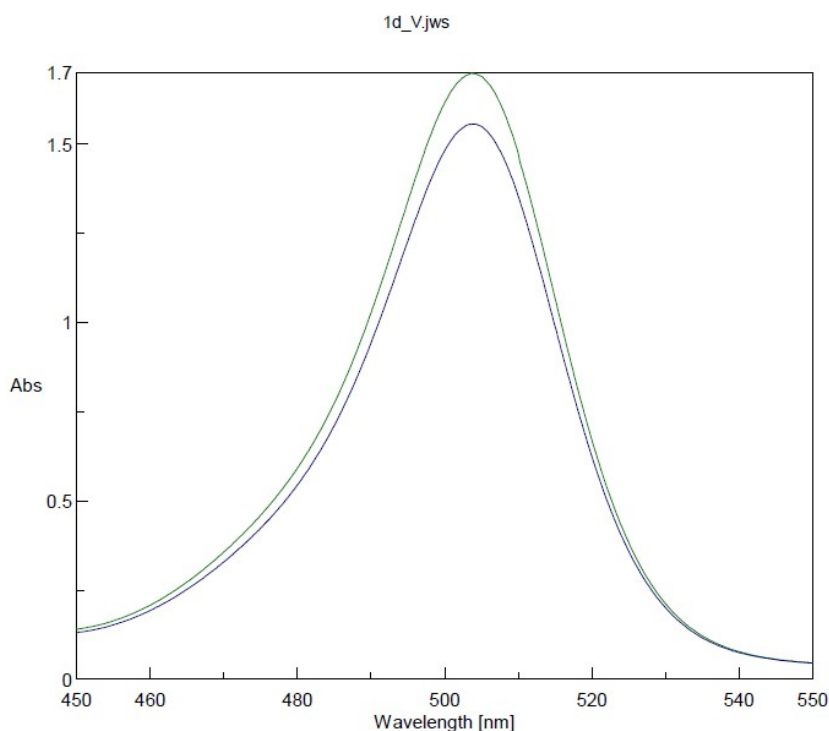

[Comments]  
 Sample name  
 Comment  
 User  
 Division  
 Company                   CBMiM PAN

[Detailed Information]  
 Creation date           08.12.2023 14:12

[Measurement Information]  
 Instrument name       V-770  
 Model name            V-770  
 Serial No.             D070961801

Accessory              PAC-743R  
 Accessory S/N         C014361221  
 Temperature          43254.43 C  
 Control sensor        Holder  
 Monitor sensor        Holder  
 Start mode            Keep +/-0.10 C of the target temperature for 5 seconds

Measurement date     08.12.2023 14:12

Parameter file         C:\Users\CBMiM PAN\Desktop\KJastrzebska\trityls\trityl.uvsp  
 Photometric mode     Abs  
 Measurement range    550 - 450 nm  
 Data interval         0.2 nm  
 UV/Vis bandwidth    0.5 nm  
 NIR bandwidth        2.0 nm  
 UV/Vis response      0.06 sec  
 NIR response         0.06 sec  
 Scan mode             Continuous

| No. | File Name | Sample Name | Co | Date             | Peak 1 | Peak Value 1 |
|-----|-----------|-------------|----|------------------|--------|--------------|
| 1   | 1d_0v.jws |             |    | 2023/12/08 14:09 | 503.6  | 1.69721      |
| 2   | 1d_V.jws  |             |    | 2023/12/08 14:12 | 503.8  | 1.55512      |

**Figure S15.** Overlaid VIS spectra for measurement of the DMT<sup>+</sup> cation absorption ( $\lambda_{\max}$ =504 nm) after consecutive detritylation steps during the coupling of **1d** in the presence of 2M Verkade base (at 1  $\mu$ mole scale).

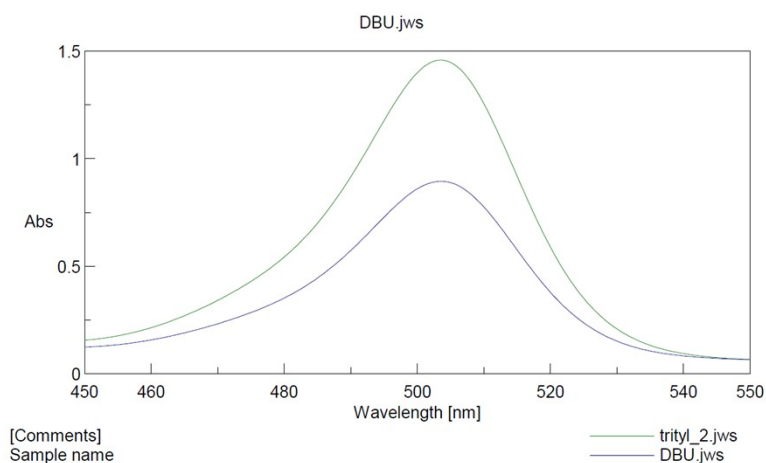

[Comments]  
 Sample name  
 Comment  
 User  
 Division  
 Company                      CBMiM PAN

[Detailed Information]  
 Creation date                      11.01.2023 14:27  
 Date modified                      01.08.2023 12:09

Data array type                      Linear data array  
 Horizontal axis                      Wavelength [nm]  
 Vertical axis                      Abs  
 Start                      550 nm  
 End                      450 nm  
 Data interval                      0.5 nm  
 Data points                      201

[Measurement Information]  
 Instrument name                      V-770  
 Model name                      V-770  
 Serial No.                      D070961801

Accessory                      PAC-743R  
 Accessory S/N                      C014361221  
 Temperature                      43254.43 C  
 Control sensor                      Holder  
 Monitor sensor                      Holder

Measurement date                      11.01.2023 14:27

Photometric mode                      Abs  
 Measurement range                      550 - 450 nm  
 Data interval                      0.5 nm  
 UV/Vis bandwidth                      2.0 nm  
 NIR bandwidth                      8.0 nm  
 UV/Vis response                      0.06 sec  
 NIR response                      0.06 sec  
 Scan mode                      Continuous

| No. | File Name    | Sample Name | Comment | Date            | Peak 1 |
|-----|--------------|-------------|---------|-----------------|--------|
| 1   | trityl_2.jws |             |         | 2023/01/11 14:2 | 503.5  |
| 2   | DBU.jws      |             |         | 2023/01/11 14:2 | 503.5  |

| No. | Peak Value 1 |
|-----|--------------|
| 1   | 1.45763      |
| 2   | 0.89423      |

**Figure S16.** Overlaid VIS spectra for measurement of the DMT<sup>+</sup> cation absorption ( $\lambda_{\max}$ =504 nm) after consecutive detritylation steps during the coupling of **1e** in the presence of 1M DBU (at 1  $\mu$ mole scale)

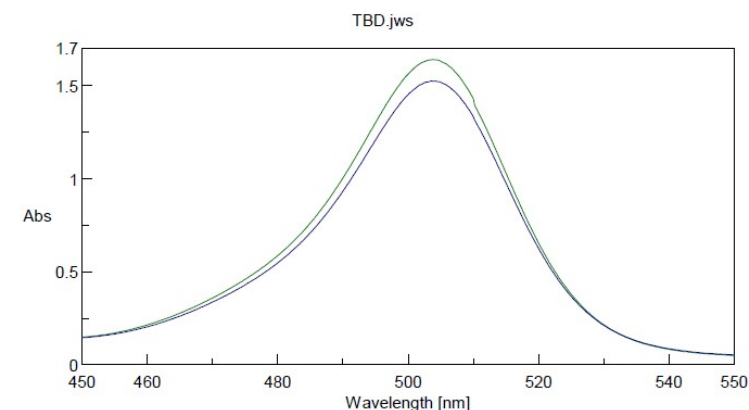

[Comments]  
 Sample name  
 Comment  
 User  
 Division  
 Company                      CBMiM PAN

[Detailed Information]  
 Creation date                      01.08.2023 11:58  
 Date modified                      01.08.2023 12:19

Data array type                      Linear data array  
 Horizontal axis                      Wavelength [nm]  
 Vertical axis                      Abs  
 Start                      550 nm  
 End                      450 nm  
 Data interval                      0.2 nm  
 Data points                      501

[Measurement Information]  
 Instrument name                      V-770  
 Model name                      V-770  
 Serial No.                      D070961801  
 Accessory                      PAC-743R  
 Accessory S/N                      C014361221  
 Temperature                      43254.43 C  
 Control sensor                      Holder  
 Monitor sensor                      Holder  
 Start mode                      Keep +/-0.10 C of the target temperature for 5 seconds

Measurement date                      01.08.2023 11:58  
 Parameter file                      C:\Users\CBMiM PAN\Desktop\KJastrzebska\trityl\trityl.uvsp  
 Photometric mode                      Abs  
 Measurement range                      550 - 450 nm  
 Data interval                      0.2 nm  
 UV/Vis bandwidth                      0.5 nm  
 NIR bandwidth                      2.0 nm  
 UV/Vis response                      0.06 sec

| No. | File Name    | Sample Name | Date             | Peak 1 | Peak Value 1 |
|-----|--------------|-------------|------------------|--------|--------------|
| 1   | trityl_1.jws |             | 2023/08/01 11:58 | 503.8  | 1.63857      |
| 2   | TBD.jws      |             | 2023/08/01 11:58 | 504.2  | 1.52392      |

**Figure S17.** Overlaid VIS spectra for measurement of the DMT<sup>+</sup> cation absorption ( $\lambda_{\text{max}}=504$  nm) after consecutive detritylation steps during the coupling of **1e** in the presence of 3M TBD (at 1  $\mu\text{mole}$  scale).

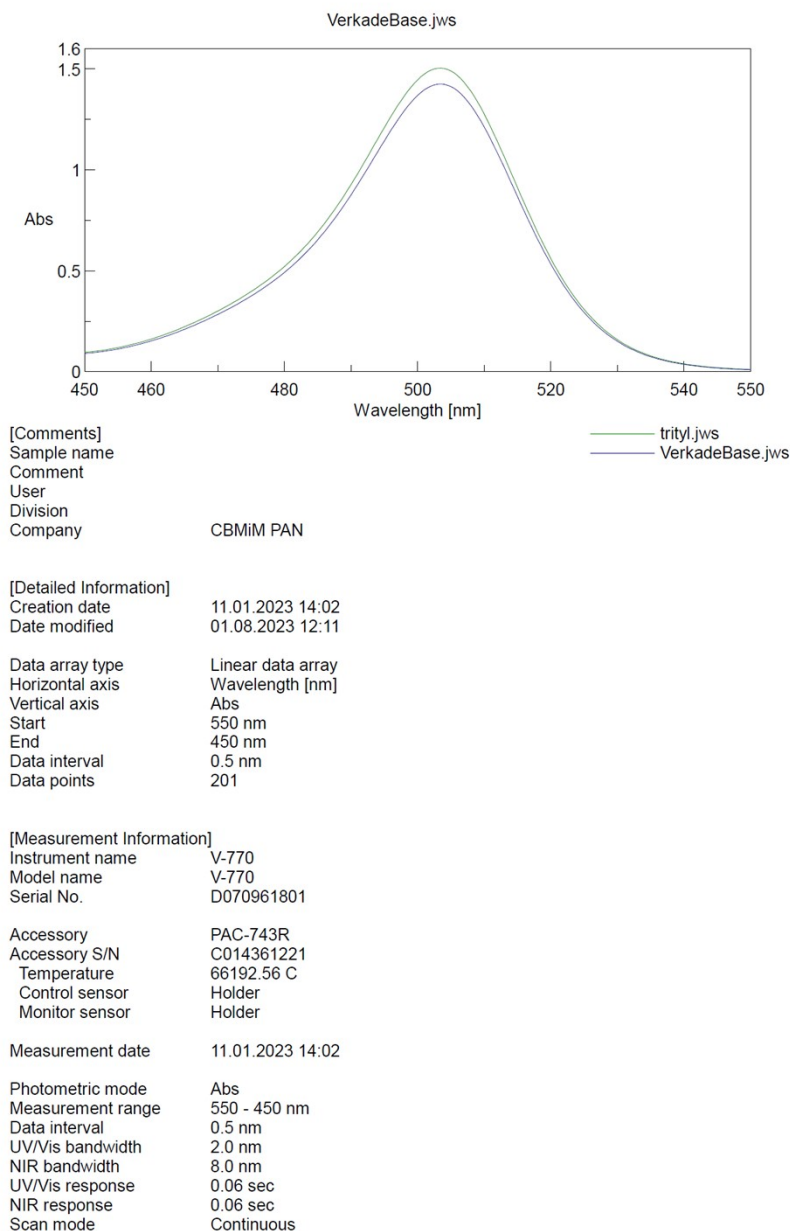

| No. | File Name      | Sample Name | Comment | Date      | Peak 1 |
|-----|----------------|-------------|---------|-----------|--------|
| 1   | trityl.jws     |             |         | 2023/01/1 | 503.5  |
| 2   | VerkadeBase.jw |             |         | 2023/01/1 | 503.5  |

| No. | Peak Vakue 1 |
|-----|--------------|
| 1   | 1.50311      |
| 2   | 1.42448      |

**Figure S18.** Overlaid VIS spectra for measurement of the DMT<sup>+</sup> cation absorption ( $\lambda_{\max}$ =504 nm) after consecutive detritylation steps during the coupling of **1e** in the presence of 2M Verkade base (at 1  $\mu$ mole scale).

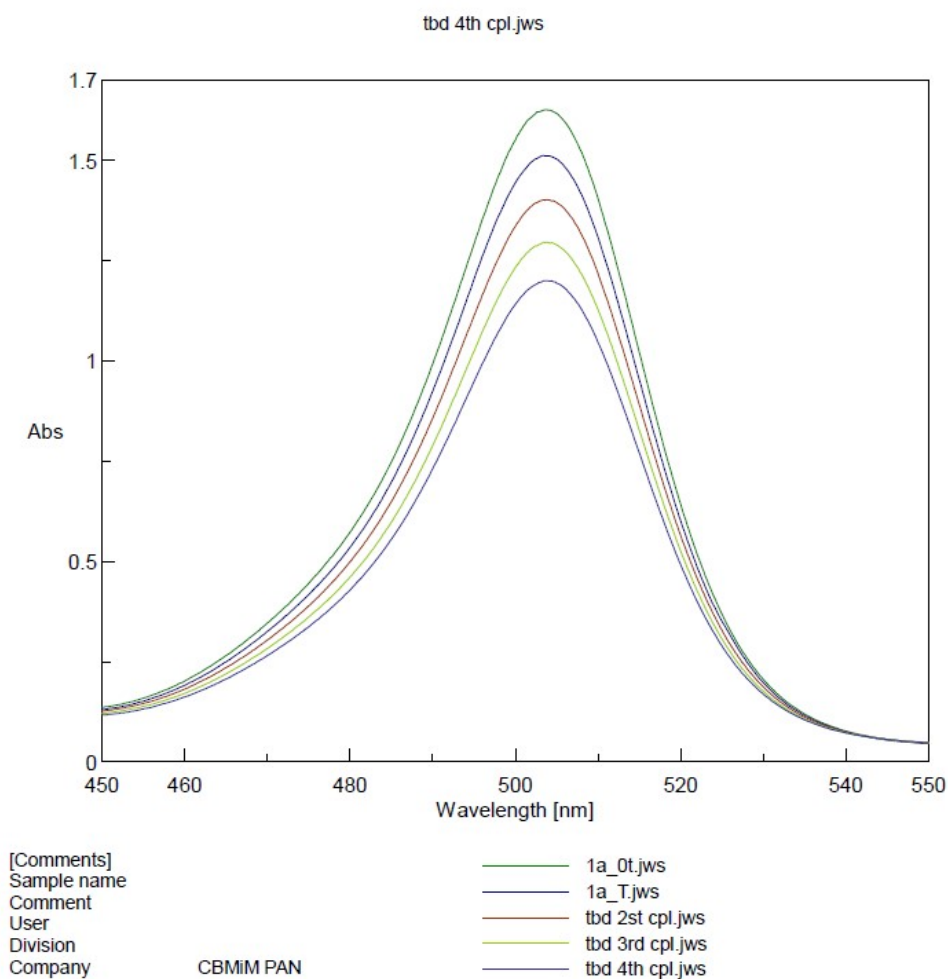

| No. | File Name       | Sample | C | Date       | Peak 1 | Peak Value 1 |
|-----|-----------------|--------|---|------------|--------|--------------|
| 1   | 1a_0t.jws       |        |   | 2023/11/11 | 503.6  | 1.62487      |
| 2   | 1a_T.jws        |        |   | 2023/11/11 | 503.4  | 1.51065      |
| 3   | tbd 2st cpl.jws |        |   | 2023/11/11 | 503.8  | 1.40092      |
| 4   | tbd 3rd cpl.jws |        |   | 2023/11/11 | 503.8  | 1.29472      |
| 5   | tbd 4th cpl.jws |        |   | 2023/11/11 | 503.4  | 1.19887      |

**Figure S19.** Overlaid VIS spectra for measurement of the DMT<sup>+</sup> cation absorption ( $\lambda_{\max}$ =504 nm) after consecutive detritylation steps during the coupling of **1a** in the presence of 3M TBD base (at 1  $\mu$ mole scale).

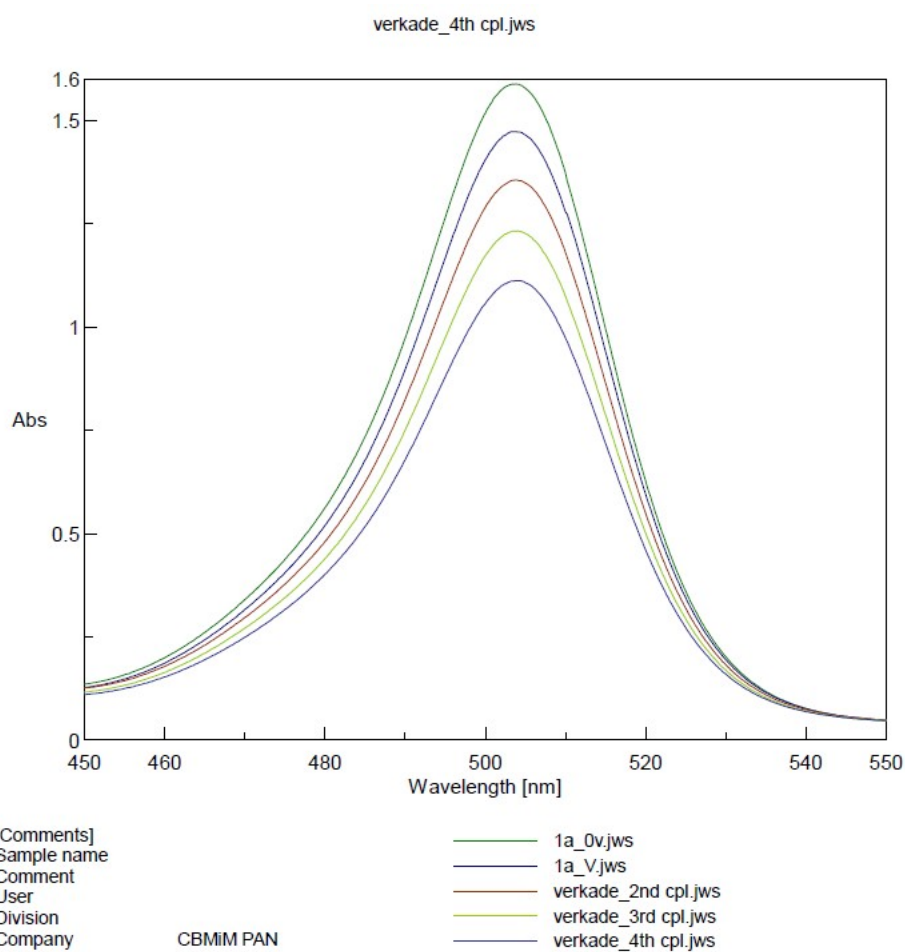

| No. | File Name           | Sample ID | Date       | Peak 1 | Peak Value 1 |
|-----|---------------------|-----------|------------|--------|--------------|
| 1   | 1a_0v.jws           |           | 2023/11/14 | 503.8  | 1.58746      |
| 2   | 1a_V.jws            |           | 2023/11/14 | 503.8  | 1.47227      |
| 3   | verkade_2nd cpl.jws |           | 2023/11/14 | 504    | 1.35457      |
| 4   | verkade_3rd cpl.jws |           | 2023/11/14 | 504    | 1.23209      |
| 5   | verkade_4th cpl.jws |           | 2023/11/14 | 504    | 1.11158      |

**Figure S20.** Overlaid VIS spectra for measurement of the DMT<sup>+</sup> cation absorption ( $\lambda_{\text{max}}=504$  nm) after consecutive detritylation steps during the couplings of **1a** in the presence of 2M Verkade base (at 1  $\mu$ mole scale).

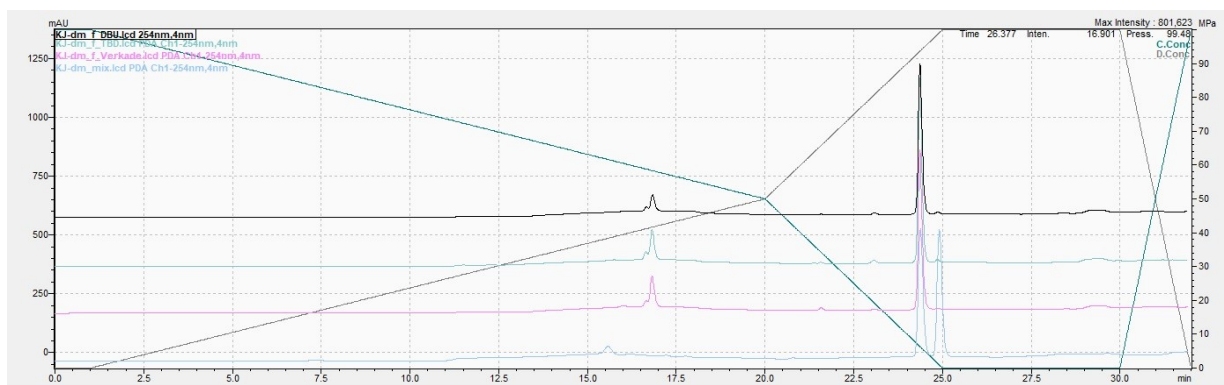

**Figure S21.** HPLC profiles recorded for P-stereodefined dinucleotides formed from OTP **1a** (*fast*-eluting P-diastereomer) in the presence of DBU (black line), TBD (green line) and Verkade base (pink line) and dinucleotide formed from OTP **1a** (mixture of P-diastereomers) in the presence of DBU (blue line).



## <Sample Information>

|                  |                        |              |             |
|------------------|------------------------|--------------|-------------|
| Sample Name      | : KJ-dm_f_DBU          | Sample Type  | : Unknown   |
| Sample ID        | :                      |              |             |
| Data Filename    | : KJ-dm_f_DBU.lcd      |              |             |
| Method Filename  | : KJ-dimer_OFF.lcm     |              |             |
| Batch Filename   | :                      |              |             |
| Vial #           | : -1                   |              |             |
| Injection Volume | : 100 uL               |              |             |
| Date Acquired    | : 2/1/2024 11:18:11 AM | Acquired by  | : Sterownik |
| Date Processed   | : 2/1/2024 11:50:12 AM | Processed by | : Sterownik |

## <Chromatogram>

mAU

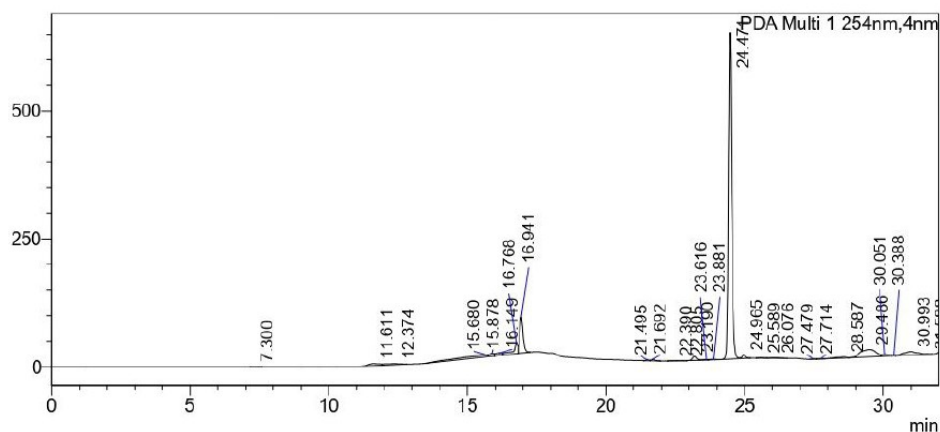

**Figure S22.** HPLC profile recorded for P-stereodefined dinucleotide formed from OTP **1a** (*fast-eluting* P-diastereomer) in the presence of DBU

<Sample Information>

|                  |                        |              |             |
|------------------|------------------------|--------------|-------------|
| Sample Name      | : KJ-dm_f_TBD          | Sample Type  | : Unknown   |
| Sample ID        | :                      |              |             |
| Data Filename    | : KJ-dm_f_TBD.lcd      |              |             |
| Method Filename  | : KJ-dimer_OFF.lcm     |              |             |
| Batch Filename   | :                      |              |             |
| Vial #           | : -1                   |              |             |
| Injection Volume | : 100 uL               | Acquired by  | : Sterownik |
| Date Acquired    | : 2/1/2024 12:59:03 PM | Processed by | : Sterownik |
| Date Processed   | : 2/1/2024 1:31:03 PM  |              |             |

<Chromatogram>

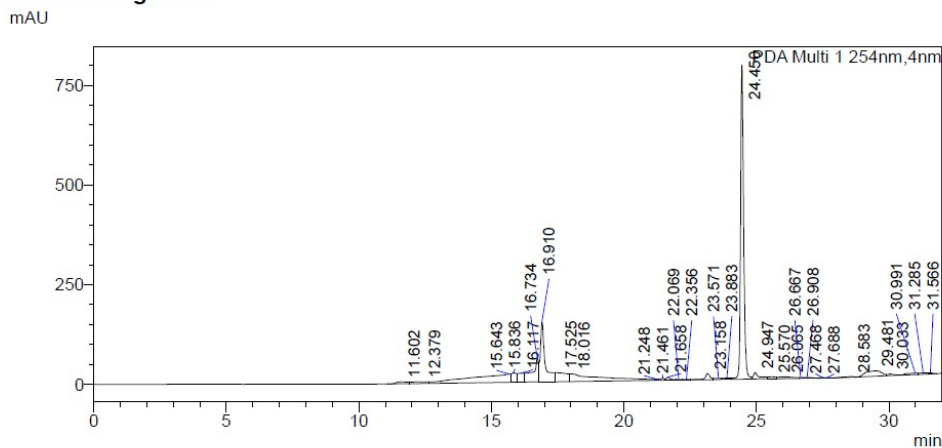

**Figure S23.** HPLC profile recorded for P-stereodefined dinucleotide formed from OTP **1a** (*fast-eluting* P-diastereomer) in the presence of TBD

SHIMADZU  
LabSolutions Analysis Report

## &lt;Sample Information&gt;

|                  |                       |              |             |
|------------------|-----------------------|--------------|-------------|
| Sample Name      | : KJ-dm_f_Verkade     | Sample Type  | : Unknown   |
| Sample ID        | :                     | Acquired by  | : Sterownik |
| Data Filename    | : KJ-dm_f_Verkade.lcd | Processed by | : Sterownik |
| Method Filename  | : KJ-dimer_OFF.lcm    |              |             |
| Batch Filename   | :                     |              |             |
| Vial #           | : -1                  |              |             |
| Injection Volume | : 100 uL              |              |             |
| Date Acquired    | : 2/1/2024 1:45:35 PM |              |             |
| Date Processed   | : 2/1/2024 2:17:35 PM |              |             |

## &lt;Chromatogram&gt;

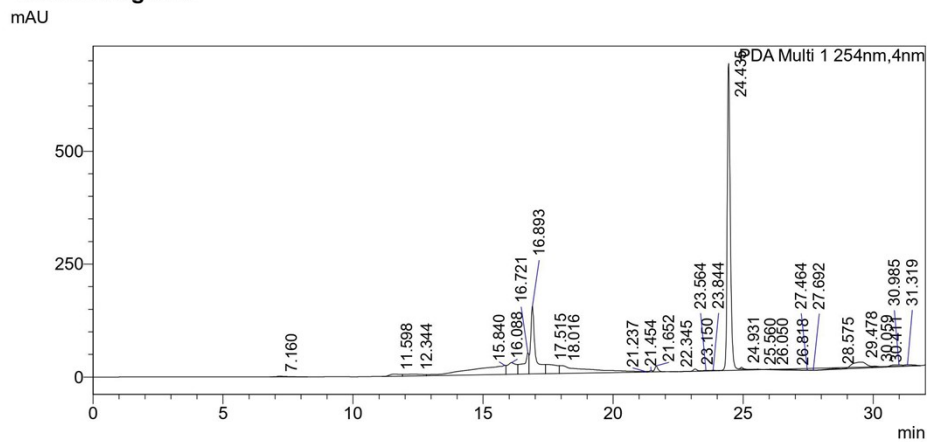

**Figure S24.** HPLC profile recorded for P-stereodefined dinucleotide formed from OTP **1a** (*fast-eluting P-diastereomer*) in the presence of Verkade base

## <Sample Information>

|                  |                       |              |             |
|------------------|-----------------------|--------------|-------------|
| Sample Name      | : KJ-dm_mix           | Sample Type  | : Unknown   |
| Sample ID        | :                     |              |             |
| Data Filename    | : KJ-dm_mix.lcd       | Acquired by  | : Sterownik |
| Method Filename  | : KJ-dimer_OFF.lcm    | Processed by | : Sterownik |
| Batch Filename   | :                     |              |             |
| Vial #           | : -1                  |              |             |
| Injection Volume | : 100 uL              |              |             |
| Date Acquired    | : 2/2/2024 9:27:58 AM |              |             |
| Date Processed   | : 2/2/2024 9:59:59 AM |              |             |

## <Chromatogram>

mAU

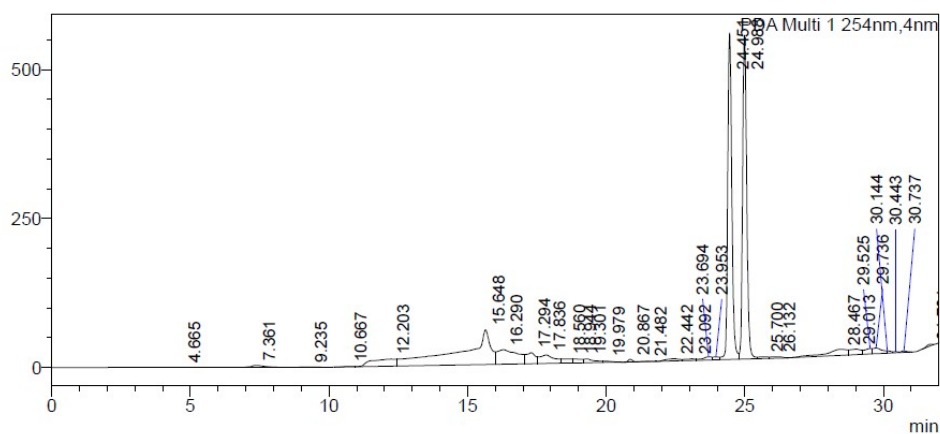

**Figure S25.** HPLC profile recorded for dinucleotide formed from OTP **1a** (mixture of P-diastereomers) in the presence of DBU
